# Supplementary material for: Pine Pollen-Derived Activated Carbon for High-Performance Supercapacitor Electrodes: A Comparative Study of KOH and CuCl 2 Activation
Source: Research Square preprint supplement (doi:10.21203/rs.3.rs-5742394/v1), 2025-01-08
Supplement: Supplementary file 1 [file 1334522ade2d37fef29a3bb1.docx]

**Supporting Information**

**Pine Pollen-Derived Porous Carbon by Chemical Activation for Supercapacitor Electrodes**

Harun Kaya1, Aydan Aksogan Korkmaz2, Seher Guler3 and Funda Ersoy Atalay3,*

1Malatya Turgut Ozal University, The Faculty of Engineering and Natural Sciences, Malatya, Turkey

2Malatya Turgut Ozal Univ, Hekimhan MES Vocat Sch, Min Technol, Malatya, Turkiye

3Inonu University, The Faculty of Science and Arts, Department of Physics, Malatya, Turkey,

*Corresponding author:funda.atalay@inonu.edu.tr

Number of pages: 4; Number of figures:3


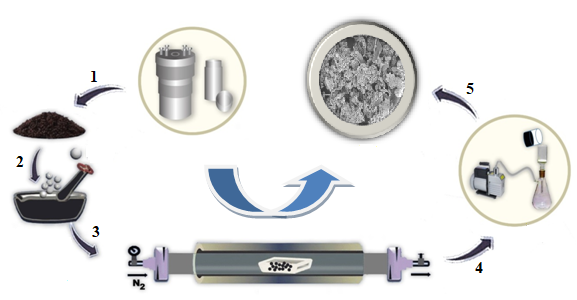


**Figure S1.** Steps of activated carbon synthesis process.


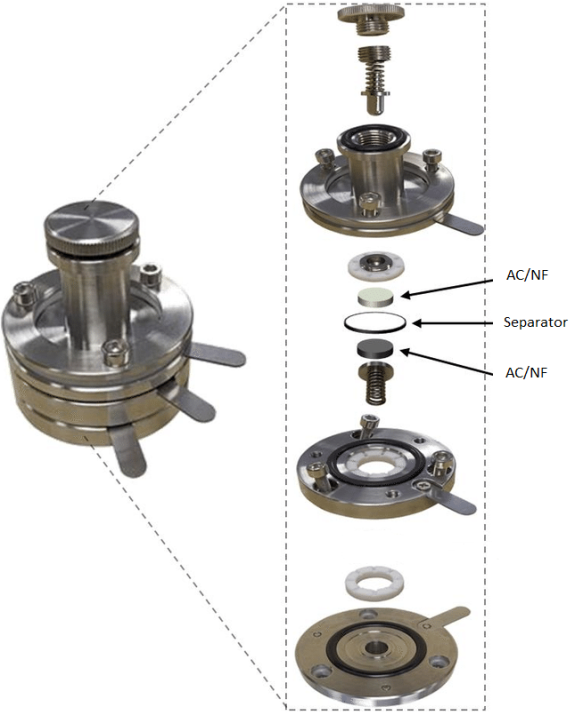


**Figure S2.** Swagelok cell components and the supercapacitor device were created using this cell.

**a)**

**b)**

**c)**

**Figure S3. a)** CV curves of symmetrical AC supercapacitor, b) Galvanostatic first ten CD curves of symmetrical KAC supercapacitor at 10 A/g, c) Long-term CD measurements of a symmetrical KAC supercapacitor at 10 A/g.
